1           **Parasite transmission in aquatic ecosystems under climate change: joint effects of**  
2           **temperature, host behavior and elimination of parasite larvae by predators.**

3 **Running head:** Parasite transmission and climate change

4           Gopko M.<sup>1\*†</sup>, Mironova E.<sup>2†</sup>, Pasternak A.<sup>3</sup>, Mikheev V.<sup>1</sup> and J. Taskinen<sup>4</sup>

5 <sup>1</sup> Severtsov Institute of Ecology and Evolution RAS, Laboratory for Behaviour of Lower  
6 Vertebrates

7 Moscow, Russia

8 <sup>2</sup> Severtsov Institute of Ecology and Evolution RAS, Center of Parasitology

9 Moscow, Russia

10 <sup>3</sup> Shirshov Institute of Oceanology RAS, Plankton ecology laboratory

11 Moscow, Russia

12 <sup>4</sup> Jyväskylän Yliopisto, Department of Biological and Environmental Science

13 Jyväskylä. Finland

14 \* **Corresponding author.** E-mail: [gopkomv@gmail.com](mailto:gopkomv@gmail.com), tel.: +7 (495) 954 75 53.

15 † Equal contribution.

16 **Keywords:** host-parasite interactions, disease transmission, fish behavior, predation on cercariae,  
17 *Diplostomum pseudospathaceum*, rainbow trout, freshwater mussels, global warming

18 **Abstract**

19 1. A moderate raise in temperature was suggested to enhance the impact of parasites on aquatic  
20 ecosystems. Under higher temperatures, poikilothermic animals (e.g. fish), increase their activity,  
21 which can result in a more frequent encounter with parasites. However, temperature increase may  
22 also trigger processes counteracting an increased risk of parasitic infections. For instance, removal

23 of free-living stages of parasites by filter-feeding organisms can increase with temperature and  
24 potentially mitigate disease risk in ecosystems under climate change.

25 2. In our study, we aimed to find out whether an increased infection transmission under higher  
26 temperatures can be, at least, partly compensated by the increased removal of parasitic larvae by  
27 aquatic predators. In addition, we planned to reveal the behavioral mechanism underlying the more  
28 successful transmission of the parasite at higher temperatures.

29 3. We experimentally studied how temperature, the behavior of fish host (rainbow trout) and the  
30 presence of filter-feeding mussels in the environment influence transmission success of trematode  
31 larvae (*Diplostomum pseudospathaceum* cercariae) to fish host.

32 4. We found that temperature raise increased, while presence of filter-feeding mussels in the  
33 environment decreased infection intensities in fish. However, the effect of mussel's presence was  
34 constant within the tested range of water temperatures (15-23°C), which suggests that it cannot  
35 compensate for the observed increased transmission of parasites under temperature raise. The  
36 difference in fish individual behavior (swimming activity) before the exposure to parasites was a  
37 substantial factor affecting host's vulnerability to infection. However, fish motor activity only  
38 weakly correlated with temperature, therefore, it is unlikely to be responsible for the increased  
39 infection success under warmer conditions. After exposure to parasites, fish strongly decreased their  
40 activity. This decrease was temperature-dependent and more pronounced in bolder (more active)  
41 fish, which leads to lower variability in activity of fish exposed to parasites compared with the safe  
42 environment. Post-exposure activity did not influence the infection intensity.

43 5. In general, we showed that the elimination of trematode larvae by filter-feeders is unlikely to  
44 deter the potential effects of global warming on host-parasite interactions in temperate freshwater  
45 ecosystems.

46

47

## 48 **Introduction**

49       Recent studies suggest that the impact of parasites on aquatic ecosystems can be considerably  
50 affected by climate change (Studer et al., 2010; Löhmus & Björklund, 2015; Marcogliese, 2016;  
51 Cable et al., 2017). In general, though it differs from one host-parasite system to another, a  
52 moderate increase in water temperature can enhance transmission of the majority of parasitic  
53 species, e.g. by increasing the rate and by lengthening of the annual period of larval production,  
54 affect life cycles and the global distribution of parasites (Harvell et al., 2002; Utaaker and  
55 Robertson, 2015; Löhmus & Björklund, 2015; Barber et al., 2016; Baker et al., 2018; Mouritsen et  
56 al., 2018)□. In addition, global warming causes multiple shifts in biology (growth, behavior,  
57 abundance, diversity, etc.) of their hosts and predators influencing interactions of these organisms  
58 with parasites (Macnab & Barber, 2011; Löhmus & Björklund, 2015; Brunner & Eizaguirre,  
59 2016)□. Along with the fish-host immunity suppression caused by the temperature raise (Dittmar et  
60 al., 2014)□, changes in the behavior of receptive hosts is one of the potential mechanisms providing  
61 increased parasite transmission. For instance, increased activity or ventilation rate (Pritchard et al.,  
62 2001; Mikheev et al., 2014; Löhmus & Björklund, 2015) can lead to increased exposure of fish to  
63 parasites.

64       However, temperature raise may also launch ecosystem processes, which compensate for the  
65 increased transmission success of parasites. Free-living stages of parasites comprise a substantial  
66 share of the biomass in aquatic ecosystems (Lafferty et al., 2008; Kuris et al., 2008)□ and many  
67 aquatic animals consume parasitic larvae, thus, significantly reducing transmission of parasites  
68 (Thieltges et al., 2008; Johnson et al., 2010; Welsh et al., 2014; Gopko et al., 2017). Feeding rates of  
69 ectothermic organisms are strongly temperature-dependent like most metabolic processes (Schmidt-  
70 Nielsen, 1997). For instance, removal of free-living stages of parasites by filter-feeders is suggested

71 to increase with temperature up to a threshold level determined by physiological characteristics of  
72 predators (Burge et al., 2016)□. However experimental data about the effect of temperature on the  
73 elimination of parasites by aquatic predators are still scarce (Goedknecht et al., 2015)□ and do not  
74 include observations of host behavior. To our knowledge, there is only one study which reported  
75 that the presence of predators (barnacles) at higher temperatures has a stronger effect on infection  
76 transmission than at lower ones (Goedknecht et al., 2015)□.

77 Change in fish vulnerability to infection caused by temperature raise could be mediated by  
78 fish behavior. For instance, under higher temperatures fish can increase their motor or/and  
79 ventilation activity which potentially increases exposure rate, thus increasing parasite's chances to  
80 penetrate host skin and gills (Mikheev et al., 2014)□. In addition, individual behavioral variation  
81 can also influence host vulnerability to infection. For instance, it was suggested that more risky and  
82 exploratory individuals (i.e. individuals with higher motor activity) might be at a higher risk of  
83 infection compared with shyer ones (Hoverman & Searle, 2016; Buck et al., 2018)□. Though  
84 correlation between animal behavior traits and parasitic load was suggested in many studies  
85 (Hoverman & Searle, 2016; Barber et al., 2017; Cable et al., 2017)□, an influence of individual's  
86 personality on vulnerability to infection has rarely been tested experimentally (see however  
87 Koprivnikar et al. (2012) and Araujo et al. (2016)□).

88 A recent study showed that filter-feeding freshwater mussels *Anodonta anatina* can  
89 significantly reduce transmission of the fish trematode *Diplostomum pseudospathaceum* by  
90 eliminating its free-living stages, i.e. cercariae (Gopko et al., 2017)□. This parasite is very common  
91 in limnetic systems of temperate and boreal zones, infect a plethora of fishes, and can hamper fish  
92 farming (Valtonen & Gibson, 1997; Karvonen et al., 2006).

93 In the present study, we investigated the effect of temperature and mussels (*A. anatina*) on the  
94 transmission of a common fish trematode (eye fluke, *D. pseudospathaceum*) with a focus on

95 potential interactions between these two factors and fish behavior.

96 Our main hypotheses were: (1) fish (*Onchorhynchus mykiss*) will be more vulnerable to parasitic  
97 infection under higher temperature due to increased activity; (2) mussels can remove trematode  
98 cercariae from the water in a wide range of temperatures and their impact on the reduction of the  
99 infection in fish is temperature-dependent (i.e. they can at least partly compensate for increased  
100 vulnerability to parasites in fish caused by a temperature raise).

101

## 102 **Material and methods**

### 103 *Study objects*

104 All experiments were conducted at the Konnevesi research station (University of Jyväskylä)  
105 in summer 2017. We used a common fish trematode *D. pseudospathaceum* as the parasite, rainbow  
106 trout *O. mykiss* as the host and freshwater mussels *A. anatina* as predators of cercariae.

107 The eye fluke *D. pseudospathaceum* has three hosts in its life-cycle: freshwater mollusks  
108 (the first intermediate host), different fishes (the second intermediate host) and fish-eating birds as  
109 definitive hosts (Valtonen & Gibson, 1997; Karvonen et al., 2006)□. In fish, this parasite localizes  
110 in the eye lenses and decreases host fitness by impairing vision (Owen et al., 1993; Karvonen et al.,  
111 2004a)□ and manipulating host's behavior (Seppälä et al., 2004; Mikheev et al., 2010; Gopko et al.,  
112 2015, 2017a)□. Young-of-the-year rainbow trout were obtained from a commercial fish farm and  
113 acclimated in the laboratory at least for two weeks before the experiments. At the fish farm, rainbow  
114 trout were maintained in ground water and, therefore, were free of macroparasites. *A. anatina*  
115 mussels were collected from Lake Jyväsjärvi and were acclimated at the lab for a week before the  
116 experiments. Each mussel was observed to filter actively (siphons protruded) before the start of the  
117 experiment. Infected pond snails *Lymnaea stagnalis* collected from Lake Konnevesi were used as a  
118 source of *D. pseudospathaceum* cercariae. The shedding of cercariae by snails was checked visually

119 by incubation of snails in glasses with filtered lake water under the bright light for several hours.  
120 Since in Finland (including Lake Konnevesi) *L. stagnalis* is typically infected with *D.*  
121 *pseudopathaceum* rather than other related diplostomidae species (Louhi et al., 2010; Rellstab et  
122 al., 2011), the cercariae were identified microscopically by their morphology.

### 123 *Experimental design*

124 The experiment was divided on 'tests' conducted seven times in a row (at different temperatures) so  
125 that each test was started after the previous one ended. In each test, fish randomly chosen from the  
126 stock maintained in the laboratory were placed individually in 26-28 white containers (30x40x25  
127 cm) filled with 12L of filtered lake water and were acclimated for an hour before exposure to  
128 cercariae. Fish were randomly assigned to four treatments (6-7 replicates in each). During the  
129 acclimation period, water in half of the containers was slowly warmed with aquarium heaters, while  
130 in another half, similar heaters were placed, but switched off. In addition, in half of the containers in  
131 each heating treatment, we placed live *Anodonta anatina* (one mussel per container), while in other  
132 half closed empty shells of mussels. Empty shells and switched off heaters were placed in  
133 containers to minimize the difference in fish behavior between the treatments (Gopko et al.,  
134 2017b)□. Therefore, there were the following four treatments (6-7 fish in each): (1) containers with  
135 heating and the presence of live mussel (H+M+), (2) containers with heating and the presence of  
136 empty shell, i.e. 'mussel' control (H+M-), (3) containers with switched-off heaters and live mussels  
137 (H-M+) and (4) with switched-off heaters and empty shells (H-M-).

138 Tests were started at the same time of the day (between 0:30 and 1:30 p.m) to exclude potential  
139 effects of the circadian rhythms. Each test lasted for two days (the first day – infection, the second –  
140 dissection). In three tests, the temperature in containers with heating was set close to 19.5°C  
141 (mean±SD = 19.6±1.59°C), while in four others it was around 22.5°C (22.6±1.48°C). In control  
142 containers, the temperature was about 15-17°C (16.0±0.70°C). These values are typical of the  
143 surface layer in Lake Konnevesi after wind mixing in summer (mean daily temperature range 11.9–

144 20.0, mean±SE = 16.1±1.23°C) (Kuha et al., 2016). Thus, the lowest water temperature in our  
145 experiment reflected natural conditions in nearshore regions of this lake. In addition, these  
146 temperatures are also similar to mean summer temperatures in temperate lakes (mean±SE =  
147 16.8±0.52°C), which were calculated using data from ‘laketemps’ package (Sharma et al., 2015)□  
148 (see Supplement, Methods 1, for details). Therefore, temperatures in containers with heating reflect  
149 moderate predictions of temperature increase (1 – 5°C) by the end of the 21st century (IPCC, 2014,  
150 2014) being far from the most pessimistic and extreme predictions for the temperate lakes in the  
151 northern hemisphere (Sharma et al., 2007)□.

152 The temperature was measured in each container before the first fish activity tracking (see below)  
153 and at the end of the experiments (after removing fish from containers), and did not change  
154 significantly during this period. Temperature values obtained during post-experimental  
155 measurement were used in the statistical analysis.

156 However, there was a substantial temperature variation both among controls in different tests (due  
157 to changes in the outside temperature) and among heated containers, because our heaters cannot be  
158 precisely calibrated. Therefore, in the statistical analysis, we treated temperature as a continuous  
159 predictor, while statistical models, where the temperature was considered as a factor are presented  
160 in a Supplement (Methods 4, Results).

161 In total, 180 fish were used in the statistical analysis (see, however, *Fish activity tracking* section),  
162 because 16 individuals were lost due to jumping out from containers, death for unknown reasons or  
163 obvious signs of sickness and therefore were excluded from the sample. Fish loss never exceeded 3  
164 individuals per test and the resulting number of rainbow trout used in all treatments were similar  
165 ranging from 43 to 47 fish. Therefore, it is unlikely that an uneven fish loss in different treatments  
166 can influence the results of the statistical analysis.

167 *Infection protocol and dissections*

168 Fish were exposed to freshly produced *D. pseudopathaceum* cercariae obtained from five *L.*  
169 *stagnalis* snails less than 2 h before the exposure. The infection dose was 300 cercariae per fish, the  
170 exposure time was two hours.

171 After each test, rainbow trout were caught and placed individually in 8L flow-through tanks for 24  
172 hours to let parasites reach eye lenses of the fish. Then fish were killed with an overdose of MS222,  
173 weighted and dissected. The number of *D. pseudopathaceum* metacercariae in the eye lenses of the  
174 fish was counted using a dissection microscope (32× magnification).

#### 175 *Fish activity tracking*

176 We video recorded fish behavior at different temperatures from above the aquaria for 5 minutes  
177 before and after exposure to parasites (one hour after the addition of cercariae). A grid (10x10 cm)  
178 was drawn on the bottom of each test tank and activity was measured as a number of gridlines  
179 crossed by fish in a 5-minute interval. Records were analyzed blindly (i.e. investigator was unaware  
180 about the treatment to which an observed fish belonged). Cameras were switched on from outside to  
181 avoid the influence of the investigator on fish behavior.

182 Unfortunately, due to a technical problem, all videos from one of the tests from the mild heating  
183 treatment were lost. In addition, several records were excluded from the sample, because some  
184 containers were partly out of camera range. Therefore, activity video records were obtained only for  
185 142 fish.

#### 186 *Statistical analysis*

##### 187 Influence of environmental conditions and fish weight on the infection intensity.

188 Linear mixed models were used to estimate the influence of temperature and presence/absence of  
189 alive mussel in the environment. The practical and widely used strategy to find out which variables  
190 should be included in the model is a step-down (backward) model selection, however, its too  
191 straightforward implementation (i.e. including too large a set of possibilities) can turn into a data-



192 dredging (Bolker, 2007, p. 277; Kuznetsova et al., 2017)□. Therefore, we first formulated a  
193 biologically sensible model of interest, where all variables and the interaction purposefully tested in  
194 our study were included, and then simplified the model using backward selection tool from the  
195 ‘lmerTest’ package (Kuznetsova et al., 2017)□.

196 The model was the following:  $\log(\text{infection intensity}) \sim \text{fish mass (covariate)} + \text{temperature}$   
197  $(\text{covariate}) + \text{alive mussel presence/absence (factor)} + \text{temperature*alive mussel presence/absence} +$   
198  $\text{experiment identity (random factor)}$ . Since we were interested in certain double interaction  
199  $(\text{temperature*alive mussel presence/absence})$  we included only this double interaction in our model  
200 of interest. The response variable (infection intensity, i.e. the number of *D. pseudospathaceum*  
201 metacercariae in fish) was log-transformed to meet model assumptions. To verify that we did not  
202 miss some important interactions, we also tested the model including all possible interactions using  
203 a similar approach. The resulted models were identical (see results), which suggests that models  
204 with higher order interactions are unlikely to explain the data substantially better than the model  
205 obtained by the model of interest simplification.

206 To account for the influence of fish activity on its vulnerability to parasites, we used an abridged  
207 dataset, since recordings of rainbow trout behavior were not available for all fishes (see the  
208 explanation in the *Fish activity tracking* section) and, therefore, in this case, fish activity was  
209 included in the model of interest. In all other respects, the statistical analysis was similar to the  
210 described above. We created two separate sets of models for fish activity before and after the  
211 exposure to cercariae. P-values were calculated using Kenward – Roger’s procedure for the  
212 approximation of degrees of freedom implemented in lmerTest package (Kuznetsova et al., 2017)□.

213 To present the results of the mixed-effect models graphically, partial regression plots were drawn  
214 (see the details in the Supplement, Methods 2).

215 *Activity*

216 A paired t-test was used to compare fish activity before and after the exposure to parasites. We used  
217 Fligner-Killeen test of homogeneity of variances, which is suggested to be robust against the  
218 departure from normality (Conover et al., 1981) to compare, whether variation in fish activity  
219 before the exposure to parasites was larger compared with variation after the exposure. The robust  
220 test was chosen, since the data on post-exposure fish activity violated the normality assumption  
221 (Shapiro – Wilk’s test:  $W = 0.97$ ,  $p\text{-value} = 0.005$ ).

222 To check whether environmental conditions influence fish activity before and after addition of  
223 cercariae in the containers, we started with linear mixed models where fish activity before the  
224 exposure to parasites, fish activity after the exposure and differences in activities before and after  
225 exposure served the response variables and experiment ID was a random factor. Presence of the  
226 alive mussel in the container, temperature, fish mass and interactions between the variables were  
227 components of the full model, which was then simplified using a backward selection. However, an  
228 addition of the random factor did not appear to explain a substantial amount of variance in these  
229 models ( $p > 0.3$  in both cases). Therefore, the random effect was deleted from the models and we  
230 proceeded with simple general linear models. The variable 'temperature' was centered by  
231 subtracting the mean to make the estimates of regression coefficients more biologically sensible.

232 We also checked whether fish with a different baseline level of activity (i.e. activity before adding  
233 cercariae) differed in their reaction to the presence of parasites in the environment (i.e. change in  
234 activity after adding cercariae). More technically speaking, we regressed fish pre-exposure activity  
235 versus the difference between pre- and post-exposure activity. However, the statistical evaluation of  
236 such a relationship is usually complicated because of two methodological concerns known as  
237 regression to the mean and mathematical coupling (Hayes, 1998; Tu & Gilthorpe, 2007). To  
238 account for these problems, we used a method proposed by Tu et al. (2005). For certain formulas  
239 and details see the Supplement (Methods 3), however, in brief, we calculated a correlation  
240 coefficient between pre-exposure activity and difference between pre- and post-exposure activity.

241 Then, a correct null hypothesis was determined taking into account the correlation between pre- and  
242 post-exposure activity of fish and mathematical coupling. Finally, both observed and expected (null  
243 hypothesis) correlation coefficients were  $z$ -transformed and a difference between them was  
244 compared with 0 using the  $z$ -test.

245 The models, where the temperature was considered a categorical variable (three heating treatments)  
246 were also fitted (see the Supplement, Results). Their results were very similar to the ones presented  
247 in the main text of the article.

248 All statistical tests were performed using R (R Core team, 2018)□. A package 'lme4' (Bates et al.,  
249 2015)□ was used to fit linear mixed models and get estimates of the regression coefficients.  
250 'ggplot2' (Wickham, 2009)□ and 'sjPlot' (Ludecke, 2018)□ packages were utilized to visualize the  
251 data.

## 252 **Results**

### 253 *Infection intensity*

254 Mean ( $\pm SE$ ) fish weight constituted  $7.77 \pm 0.15$  g (total 180 ind.) and  $7.48 \pm 0.15$  g (142 ind. of the  
255 abridged “activity dataset”). Fish size did not differ between the treatments (with alive mussel vs  
256 control) both for full and abridged datasets (ANOVA:  $F_{1, 178} = 0.13$ ,  $p = 0.72$  and  $F_{1, 140} = 0.12$ ,  $p =$   
257  $0.74$  respectively). Mean  $\pm SE$  infection intensity was  $46.8 \pm 2.41$  in the full and  $39.2 \pm 2.12$   
258 metacercariae per fish in the abridged dataset.

259 Linear mixed models comparison (i.e. procedure of backward model selection) showed that adding  
260 interaction terms did not lead to significant improvement of the model fit. Importantly, the  
261 interaction between temperature and presence of alive mussels was non-significant ( $F_{1, 173.1} = 1.50$ ,  
262  $p = 0.22$ , see also Table 1a), which suggests that the ability of *A. anatina* to eliminate cercariae does  
263 not change substantially under the tested temperature. Moreover, adding one of the main effects to  
264 the model (fish mass) also did not significantly increase the amount of variance explained by the

265 model (Table 1a). However, we decided to keep this predictor in the final model, since it seems  
266 biologically relevant and important. When mass was excluded from the model, p-values related to  
267 other predictor variables and the magnitude of estimated coefficients did not change substantially.  
268 Therefore, the final model contained only the main effects and test ID (random effect) as predictors  
269 (Table 1a). It showed that the effect of heating was significant and there was a 1.094-fold ( $\exp(0.09)$   
270  $= 1.094$ ) increase in parasitic load per each additional 1°C (Table 1a, Fig. 1A, C). The presence of  
271 the alive mussel in the environment decreased the *D. pseudospathaceum* infection intensity in fish  
272 by ~28% (Table 1a, Fig. 1A, C).

273 In the set of models, where the fish activity was included, the results were similar. Interactions were  
274 also not significant and were excluded from the final model. The effect of mass was again non-  
275 significant, however, this predictor was left in the model for its biological relevance, as described  
276 above. The effect of temperature was still highly significant (see table 1b, Fig. 1B, D). Fish activity  
277 before the exposure varied substantially among fish (with range 0-278 and  $\text{mean} \pm \text{SE} = 117.8 \pm 4.75$   
278  $\text{crossed lines}/5 \text{ min}$ ). The effect of fish pre-exposure activity on the infection intensity was  
279 relatively weak (about 1.0015 increase of infection intensity per each additional gridline crossed by  
280 fish). Interestingly, when fish activity after exposure (range 1-155 and  $\text{mean} \pm \text{SE} = 61.4 \pm 3.21$   
281  $\text{lines}/5 \text{ min}$ ) was added to the model instead of pre-exposure activity, it had no significant effect on  
282 the infection intensity ( $t_{132.2} = 0.67$ ,  $p = 0.51$ ). The difference in fish activity before and after  
283 exposure to cercariae also was not a significant predictor of the infection intensity ( $t_{132.5} = -1.77$ ,  $p =$   
284  $0.14$ ).

285 When the temperature was added in the model as a factorial variable, the results were very similar  
286 to the presented above (see the Supplement, Fig. S1 and Table S1).

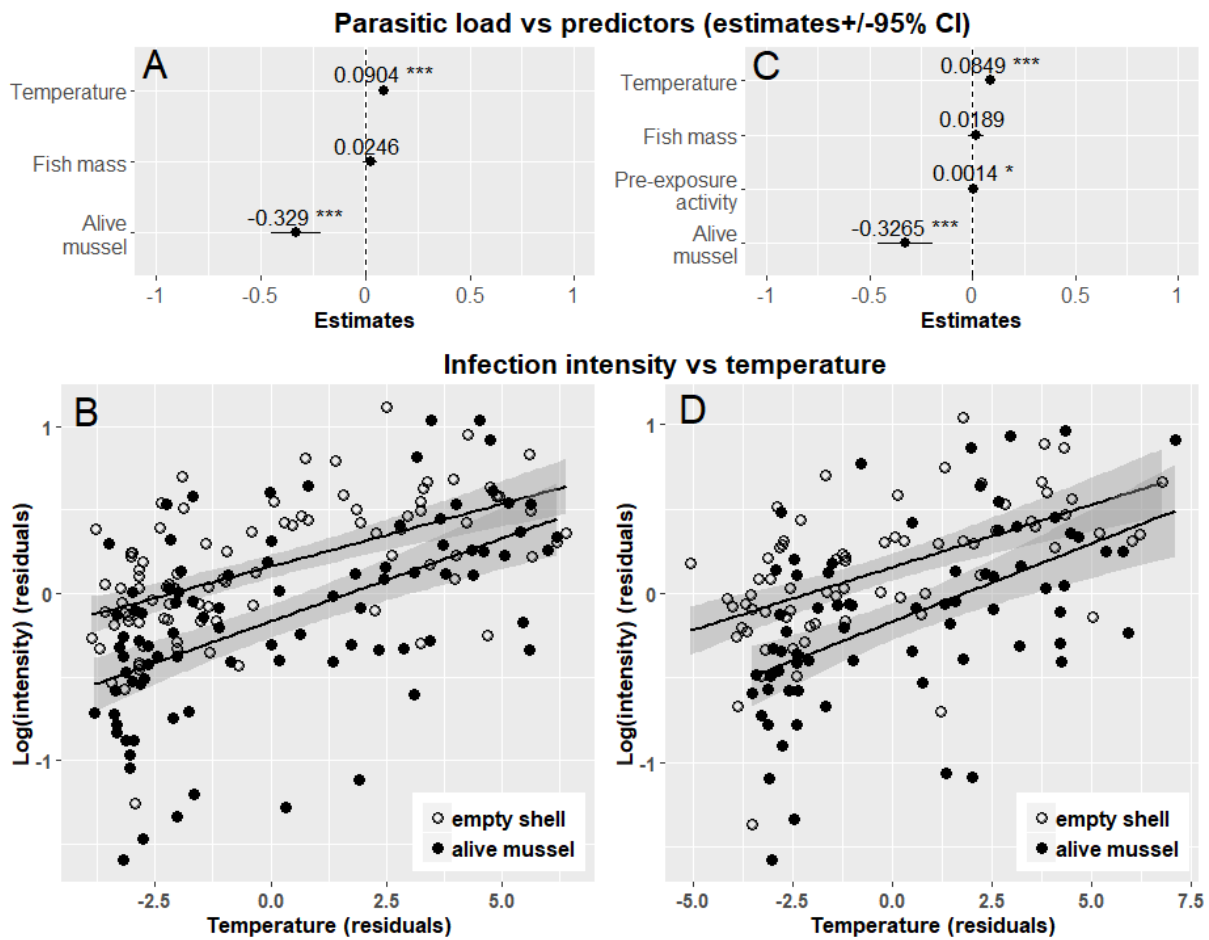

287

288 **Fig. 1.** Regression coefficients plots (A, C) and partial regression plots (B, D) showing the  
289 influence of the temperature on the infection intensity in rainbow trout for the models fitted on the  
290 full (A, B) and abridged dataset (C, D). In both cases, the presence of alive mussel in the container  
291 caused a substantial decrease in the infection intensity in fish, while temperature increase led to  
292 higher infection intensities. The regression lines for containers with alive mussels and control  
293 containers are almost parallel, confirming the lack of interaction between the temperature and  
294 presence of alive mussel in the environment. Fish, which were more active prior to the exposure,  
295 were more infected compared with less active fish (A, C) (about 15% increase in the infection  
296 intensity per 100 additional lines crossed by fish in five min).

**Table 1.** GLMM on full and abridged datasets summary tables. Log-transformed infection intensity is a response variable.

|                     | a. Full dataset models |          |                 |        |       | b. Abridged dataset models |          |                 |        |        |
|---------------------|------------------------|----------|-----------------|--------|-------|----------------------------|----------|-----------------|--------|--------|
| Fixed effects       | df                     | <i>t</i> | <i>p</i> -value | Est.   | SE    | df                         | <i>t</i> | <i>p</i> -value | Est.   | SE     |
| + temperature       | 173.8                  | 9.00     | < <b>0.0001</b> | 0.090  | 0.010 | 132.1                      | 7.43     | < <b>0.0001</b> | 0.085  | 0.011  |
| + alive mussel      | 173.0                  | -5.46    | < <b>0.0001</b> | -0.329 | 0.060 | 132.0                      | -4.71    | < <b>0.0001</b> | -0.327 | 0.069  |
| + activity (before) |                        |          |                 |        |       | 132.3                      | 2.14     | <b>0.034</b>    | 0.0014 | 0.0007 |
| + fish mass         | 173.9                  | 1.50     | 0.13            | 0.025  | 0.016 | 132.4                      | 0.95     | 0.35            | 0.019  | 0.020  |

297

298 *Activity*

299 Paired t-test showed that before the exposure to parasites, fish were significantly more active than  
 300 after the exposure ( $t_{141} = 10.5$ ,  $p < 0.0001$ , Fig. 2A, B). Moreover, fish were more variable in  
 301 activity levels before the exposure to parasites (Fligner-Killeen test:  $\chi^2 = 12.43$ ,  $p = 0.0004$ , Fig. 2A,  
 302 B). Interestingly, there was only a weak correlation between fish activity before and after exposure  
 303 (Spearman's rho:  $r_s = 0.19$ ,  $p = 0.03$ ).

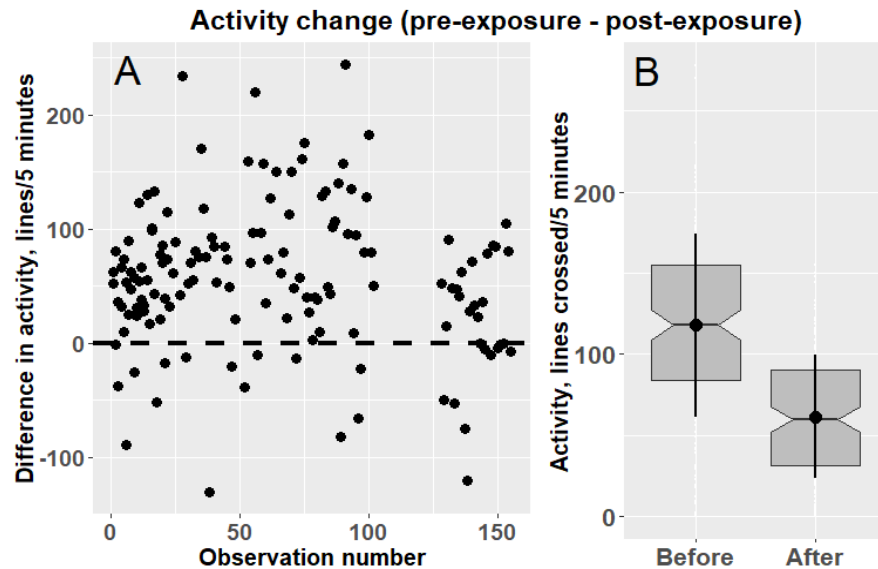

304 **Fig. 2.** Fish activity before and after the exposure to parasites. A. Difference in activity (pre-  
305 exposure activity minus post-exposure activity). Before the exposure to cercariae, most of the fish  
306 were more active than after the exposure (dots above the dashed zero line vs triangles below it). B.  
307 Fish activity and between individual variance in activity before the exposure was significantly  
308 higher than after it. The box on the plot represents the median with the interquartile range (IQR).  
309 The notches represent roughly 95% confidence intervals ( $1.58 \cdot \text{IQR} / \sqrt{N}$ ) for the medians. Dots  
310 with whiskers are mean  $\pm$  SD fish activity.

311 For the pre-exposure activity, we found that the model, where only the temperature was a predictor,  
312 fits our data significantly better than only intercept model ( $F_{1, 141} = 8.49$ ,  $p = 0.004$ ), while addition  
313 of other predictors and interactions did not explain the significant additional amount of variance.  
314 Fish activity increased with the temperature increase (Fig 3A) by extra four lines per each  
315 additional  $1^\circ\text{C}$  (Estimate  $\pm$  SE =  $4.27 \pm 1.47$ ). However, when the interaction between temperature and  
316 presence of alive mussel along with both main effects was included in the model its contribution  
317 was marginally significant ( $F_{1, 139} = 3.63$ ,  $p = 0.059$ , Fig. 3A). In other words, fish in both  
318 treatments became more active with increasing temperature. In the presence of alive mussels, they  
319 tended to increase activity even more.

320 For the post-exposure activity, the model including the presence/absence of alive mussel in the

321 container, temperature, and interactions of these effects was found the most parsimonious one.  
322 There was a significant effect of temperature (Estimate $\pm$ SE =  $-3.71\pm 1.45$ ,  $t = -2.57$ ,  $p = 0.011$ ) and  
323 interaction between the temperature and presence of alive mussel in the model (Estimate $\pm$ SE =  
324  $5.95\pm 2.00$ ,  $t = 2.97$ ,  $p = 0.004$  Fig. 3B). It means that in the containers with alive mussels fish post-  
325 exposure activity increased with temperature (regression coefficients was  $-3.71 + 5.95 = 2.24$ ),  
326 while in containers with empty shells fish activity even decreased with temperature raise, and the  
327 slopes of the regression lines differ significantly between the treatments. Though we found a  
328 significant influence of temperature on fish pre- and post-exposure activity in our models, the  
329 amount of variance explained by our predictors was fairly small (6% and 7% respectively).

330

331



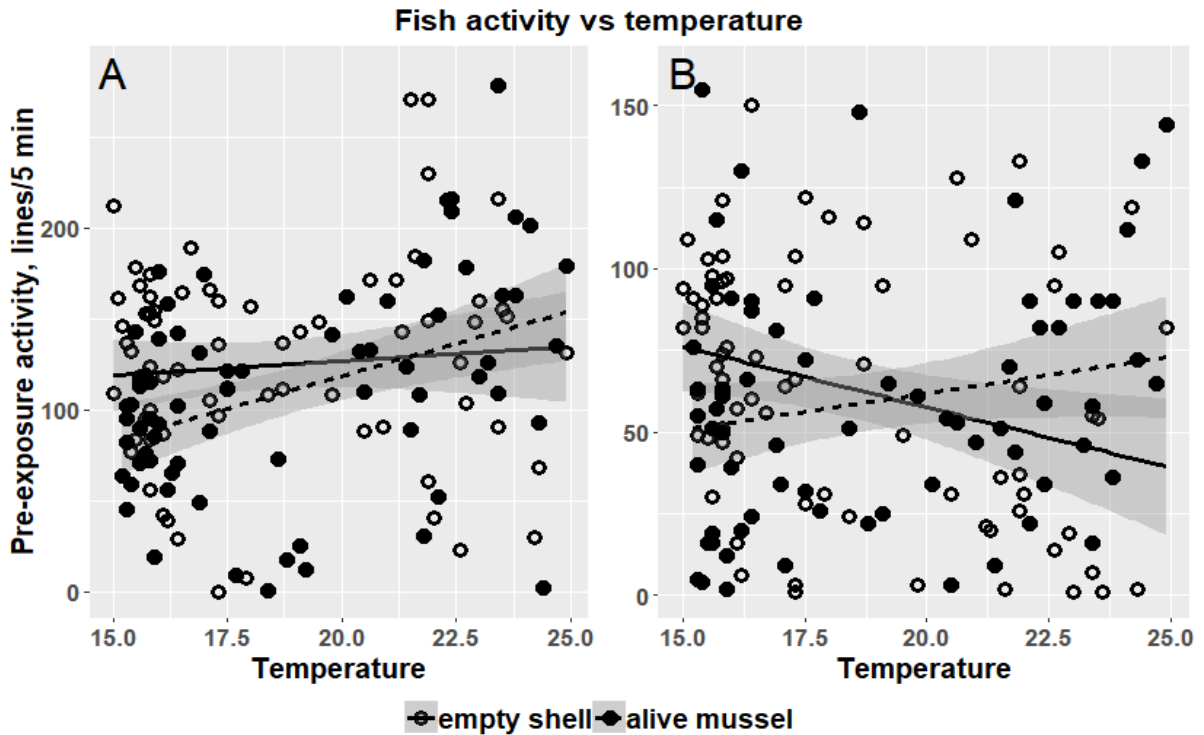

332 **Fig. 3.** Rainbow trout pre-exposure (A) and post-exposure (B) activity depending on temperature.

333 (A) Before the exposure to parasites, fish activity increased with temperature both in the presence of

334 the alive mussel and in the control (empty mussel shell) (Estimate±SE = 4.27±1.47 for the similar

335 slopes model). Though the slopes of regression lines for both groups did not differ significantly ( $p =$

336 0.06), the line for fish in the presence of alive mussels was steeper (dashed line). (B) After exposure,

337 the slopes of regression lines became significantly different. In the presence of alive mussels, fish

338 still increased their activity with increasing temperature, while in the control, fish decreased their

339 activity with temperature.

340 Temperature influenced the degree of activity change after the exposure to cercariae, i.e. pre-

341 exposure activity minus post-exposure activity (Estimate±SE = 4.95±1.67,  $t = 2.97$ ,  $p = 0.004$ , Fig.

342 4), while the addition of treatment (alive mussel/empty shell) and the interaction in the model did

343 not increase additional amount of variance (Fig. 4). Fish changed their activity more under high

344 temperatures compared with low temperatures.

345 **Fig. 4.** The decrease in fish activity  
346 after the exposure to parasites was  
347 temperature dependent and more  
348 prominent at higher than at lower  
349 temperatures (extra 4.4 lines crossed  
350 per each additional 1°C). However,  
351 this effect was not modified by the  
352 presence/absence of alive mussels  
353 (regression lines are almost parallel  
354 with overlapping confidence  
355 intervals).

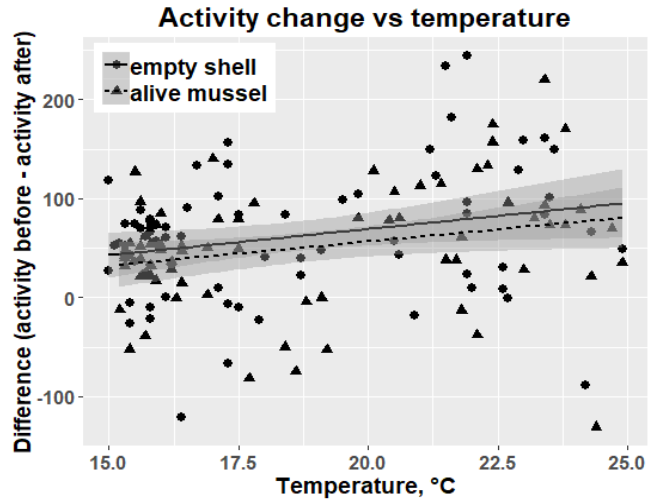

356 Fish more active before the exposure to parasites decreased their activity stronger compared with  
357 less active individuals (Fig. 5). The coefficient of correlation between baseline value (pre-exposure  
358 activity) and activity change was  $r = 0.81$ , which is significantly ( $z = 3.86$ ,  $p = 0.0001$ ) higher than  
359 null-hypothesis value ( $r = 0.66$ ) calculated following Tu et al., 2005 (See Methods and Supplement).

360 **Fig. 5.** In both treatments fish more active  
361 in the pre-exposure period decreased their  
362 activity more compared with less active  
363 fish ( $r = 0.81$ ,  $z = 3.86$ ,  $p = 0.0001$ ). The  
364 solid line is the empirical regression line  
365 ( $beta = 0.91$ ), while the dashed line is the  
366 regression line fitted using the regression  
367 coefficient ( $beta = 0.75$ ) calculated from  
368 the null-hypothetical correlation  
369 coefficient value.

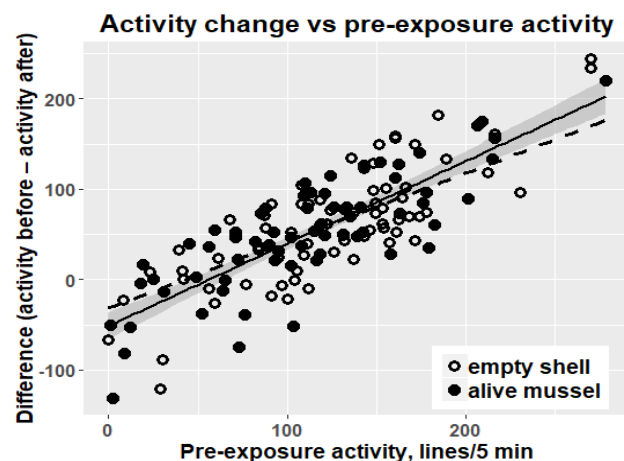

## 370 Discussion

371 Though temperature, predation on parasite larvae and host behavior are often reported as important  
372 regulators of parasite transmission (Löhmus & Björklund, 2015; Barber et al., 2016, Barber et al.,  
373 2017, Burge et al., 2016, Welsh et al., 2014), their joint effect on transmission success has, to our  
374 knowledge, never been tested experimentally.

375 We found that temperature, presence of filter-feeders (freshwater mussel *A. anatina*) in the  
376 environment and individual differences in boldness (activity in the open-field test) had a marked  
377 influence on the parasite's (common eye fluke *D. pseudospathaceum*) infection success. Infection  
378 intensity in fish increased with the temperature raise, while the presence of alive mussel led to  
379 lower parasitic load in fish. Importantly, there was no interaction between these two factors, which  
380 suggests that the effect of freshwater mussel on the infection transmission is constant at least in the  
381 temperature range (15-23°C) tested in our study. Though the increase in the filtration rate with  
382 temperature raise was demonstrated at least for several bivalve species under laboratory conditions,  
383 the slope of regression curves in these studied were generally gentle (Riisgård & Seerup, 2003;  
384 Kittner & Riisgård, 2005)□□. Review by Cranford et al. (2011)□□ suggested that in natural  
385 conditions temperature is unlikely to be an important predictor of the feeding rate in mussels.  
386 Filtration rates of mussels usually decrease under high temperatures close to the upper limit of  
387 mussel's physiological tolerance (Ehrich & Harris, 2015; Burge et al., 2016)□□. However, water  
388 temperatures in our experiment were typical for natural nearshore habitats of *A. anatina* and did not  
389 exceed comfort values for this species (Pusch et al., 2001; Falfushynska et al., 2014). Similarly to  
390 our results, reduction of trematode transmission by marine bivalves (oysters) was not significantly  
391 influenced by temperature, however, the hampering effect of another group of filter-feeders  
392 (barnacles) increased with temperature (Goedknecht et al., 2015).

393 Though *D. pseudospathaceum* cercariae are known to become more infective with temperature  
394 (Lyholt & Buchmann, 1996)□, the mechanism of this phenomenon is unclear. One of the possible

395 explanations for it is the increase of fish motor and ventilation activity with the temperature raise  
396 (Krause & Godin, 1995; Pritchard et al., 2001; Mikheev et al., 2014)□, which is likely to increase  
397 host-parasite encounter probability (Barber et al., 2016)□. Our results showed that correlation  
398 between fish motor activity and the temperature was surprisingly weak, however, enhanced  
399 ventilation activity, which we did not measure directly, may be responsible for higher infection  
400 success under increased temperatures found in our study. An alternative explanation is an immune  
401 system function deterioration with temperature increase (Dittmar et al., 2014). Since our heat wave  
402 was short-term, it is unlikely to have a strong influence on fish immunity, however, a performance  
403 of the innate immunity providing a defense against *D. pseudospathaceum* infection (Scharsack &  
404 Kalbe, 2014)□ deteriorates under warm conditions almost immediately (Dittmar et al., 2014).  
405 Another possible explanation is increased activity or/and metabolism of cercariae in warmer water,  
406 which can lead to a decrease in cercariae survival (Pechenik & Fried, 1995; Morley et al., 2001),  
407 but at the same time can enhance parasite's infectivity (Poulin, 2006)□, presumably due to a short-  
408 term increase in parasite's host searching activity and penetration success during short time period.  
409 Only fish activity before the exposure to parasites positively correlated with the parasitic load in  
410 fish, while post-exposure activity did not. Fish activity before the exposure strongly varied among  
411 fish and, therefore, the difference in motor activity can be a substantial factor explaining differences  
412 in parasitic load among individuals. After the exposure, most of the fish decreased their activity,  
413 reducing the risk of further infection (Karvonen et al., 2004b; Stumbo et al., 2012). These results  
414 are dissimilar with the study on tadpoles, where no significant relationship between pre-exposure  
415 activity and infection intensity was found, while activity after the exposure was negatively  
416 correlated with parasitic load (Koprivnikar et al., 2012)□□. Previously, a decrease in fish activity  
417 was reported as a possible defense against a parasitic threat (Stumbo et al., 2012)□. On the other  
418 hand, decrease in activity can also be a non-specific response to the presence of the alarm  
419 substances released from the skin of rainbow trout (Sovová et al., 2014)□ damaged by penetration

420 of *D. pseudospathaceum* cercariae (Poulin et al., 2005). In general, after the exposure to parasites,  
421 more active fish decreased their activity stronger than less active ones, which eventually reduced  
422 variability in activity after the exposure to parasites. In non-risky conditions, bolder (more active)  
423 fish may benefit from quicker food and shelter search, etc., while the main advantage of shyness is  
424 lower vulnerability to new threats in the environment. Therefore, when parasite threat arises,  
425 activity reduction to some optimal level may become a more beneficial strategy. This Our  
426 observation is in conformity with a previous study, which showed that more bold individuals can  
427 compensate risky lifestyles with a quicker and more pronounced behavioral response to the parasitic  
428 threat (Klemme & Karvonen, 2016)□. Therefore, we suggest that the fish personality affects fish  
429 vulnerability to parasites immediately after the host encounter with the parasitic threat. Later, all  
430 fish decrease their activity to a more or less uniform level. Therefore, under common environmental  
431 threats, animal personality traits can become less expressed and behavior more uniform shrinking to  
432 some optimal level. In other words, fish manifest a kind of a behavioral oddity decrease in risky  
433 environments. Though oddity is a well-known factor increasing individual's susceptibility to  
434 predators (Milinski, 1977, Quattrini et al., 2018, Rodgers et al., 2015), it was mainly considered  
435 from the predator's point of view. However, animals' ability to self-tune their personality traits in  
436 risky environments to avoid other potential threats, e.g. parasites, deserves more attention.

437 The presence of alive mussels in the environment can influence the relationship between  
438 temperature and fish activity. Interestingly, in the absence of alive mussels fish post-exposure  
439 activity even decreased with temperature raise, but when mussels were present in the container, the  
440 positive relationship between temperature and activity remained. It means that in a more risky  
441 environment (without mussels, filtering cercariae) fish may try to compensate for the increased risk  
442 of being infected at higher temperatures by changing their behavior in a more radical way.  
443 Previously, it was shown that fish, which are less resistant against parasites can invest more in  
444 developing parasites avoidance behavior compared with less vulnerable fish (Klemme & Karvonen,

445 2016).

446 Our research is likely to reveal only short-term ecological effects of heating within the limits of  
447 individual plasticity of studied organisms, while global warming may cause prolonged evolutionary  
448 processes, which also should be taken into account.

449

## 450 **Conclusions**

451 In our study, we showed that under temperature increase similar to the predicted for aquatic habitats  
452 by the end of this century, fish became more vulnerable to parasitic infection. Though filter-feeders  
453 (mussels) can effectively eliminate cercariae from the water, decreasing the parasitic load in fish,  
454 this effect remained fairly constant under a relatively broad range of temperatures. Therefore, it is  
455 unlikely that filter-feeders can compensate for the increased spread of infectious diseases with  
456 climate change as it was previously suggested (Burge et al., 2016).

457 At the first encounter with the parasitic threat, increase in vulnerability to parasites can be  
458 connected with the increased activity of fish caused by the increased temperature, however, these  
459 behavioral changes are unlikely to be the only factor predisposing fish to parasites under higher  
460 temperatures. After more prolonged exposure to parasites, fish activity substantially decreased and  
461 its influence on parasitic loads disappeared. This decrease in motor activity was temperature-  
462 dependent and more pronounced in bolder (more active) fish, which led to lower variability in fish  
463 activity in the presence of parasites compared with the safe environment. Therefore, when working  
464 together, warming and parasite threat both can influence fish behavior, altering motor activity and  
465 making personality traits less expressed.

## 466 **Acknowledgments**

467 We want to thank the technical staff of the Konnevesi research station (University of  
468 Jyväskylä, Finland) for their assistance. The research was supported by the Academy of Finland (JT,

469 mobility grants 311033 and 326047); the Otto Kinne Fellowship (EM, grant 2017); the Ella and  
470 Georg Ehrnrooth Foundation (MG, mobility grant 2018), the Russian Foundation for Basic  
471 Research (VM, grant 17-04-00247); the Ministry of Education and Science of the Russian  
472 Federation (AP, the state assignment theme 0149-2019-0008) and Russian Science Foundation grant  
473 to VM and MG (19-14-00015).

474 Authors declare that they have no conflicts of interest.

#### 475 **Authors' contributions**

476 All authors conceived the study. MG and EM conducted the experiments, performed the  
477 statistical analysis and wrote the major part of the article. AP, VN and JT discussed the results of the  
478 study, wrote minor passages of the text and revised the manuscript. JT supervised the study.

#### 479 **Data accessibility**

480 All data used in the paper are stored in the figshare repository and can be accessed freely  
481 (<https://doi.org/10.6084/m9.figshare.8080907>).

#### 482 **References**

483 Araujo, A., Kirschman, L., & Warne, R. W. (2016). Behavioural phenotypes predict disease  
484 susceptibility and infectiousness. *Biology Letters*, **12**(8), 20160480.

485 <https://doi.org/10.1098/rsbl.2016.0480>

486 Baker, D. M., Freeman, C. J., Wong, J. C. Y., Fogel, M. L., & Knowlton, N. (2018). Climate change  
487 promotes parasitism in a coral symbiosis. *The ISME Journal*, **12**(3), 921–930.

488 <https://doi.org/10.1038/s41396-018-0046-8>

489 Barber, I., Berkhout, B. W., & Ismail, Z. (2016). Thermal Change and the Dynamics of Multi-Host  
490 Parasite Life Cycles in Aquatic Ecosystems. *Integrative and Comparative Biology*, **56**(4), 561–  
491 572. <https://doi.org/10.1093/icb/icw025>

- 492 Barber, I., Mora, A. B., Payne, E. M., Weinersmith, K. L., & Sih, A. (2017). Parasitism, personality  
493 and cognition in fish. *Behavioural Processes*, **141**, 205–219.  
494 <https://doi.org/10.1016/j.beproc.2016.11.012>
- 495 Bates, D., Mächler, M., Bolker, B., & Walker, S. (2015). Fitting Linear Mixed-Effects Models  
496 Using lme4. *Journal of Statistical Software*, **67**(1), 1–48. <https://doi.org/10.18637/jss.v067.i01>
- 497 Bolker, B. (2007). *Ecological Models and Data in R*. Princeton University Press. Retrieved from  
498 <https://ms.mcmaster.ca/~bolker/emdbook/book.pdf>
- 499 Brunner, F. S., & Eizaguirre, C. (2016). Can environmental change affect host/parasite-mediated  
500 speciation? *Zoology*, **119**(4), 384–394. <https://doi.org/10.1016/j.zool.2016.04.001>
- 501 Buck, J. C., Weinstein, S. B., & Young, H. S. (2018). Evolutionary Consequences of Parasite  
502 Avoidance. *Trends in Ecology & Evolution*, **33**(8), 619–632.  
503 <https://doi.org/10.1016/j.tree.2018.05.001>
- 504 Burge, C. A., Closek, C. J., Friedman, C. S., Groner, M. L., Jenkins, C. M., Shore-Maggio, A., &  
505 Welsh, J. E. (2016). The Use of Filter-feeders to Manage Disease in a Changing World.  
506 *Integrative and Comparative Biology*, **56**(4), 573–587. <http://dx.doi.org/10.1093/icb/icw048>
- 507 Cable, J., Barber, I., Boag, B., Ellison, A. R., Morgan, E. R., Murray, K., ... Booth, M. (2017).  
508 Global change, parasite transmission and disease control: lessons from ecology. *Philosophical  
509 Transactions of the Royal Society of London. Series B, Biological Sciences*, **372**(1719),  
510 20160088. <https://doi.org/10.1098/rstb.2016.0088>
- 511 Conover, W. J., Johnson, M. E., & Johnson, M. M. (1981). A Comparative Study of Tests for  
512 Homogeneity of Variances, with Applications to the Outer Continental Shelf Bidding Data.  
513 *Technometrics*, **23**(4), 351–361. <https://doi.org/10.1080/00401706.1981.10487680>
- 514 Conover, W. J., Johnson, M. E., & Johnson, M. M. (1981). A Comparative Study of Tests for



- 515 Homogeneity of Variances, with Applications to the Outer Continental Shelf Bidding Data.  
516 *Technometrics*, **23**(4), 351–361. <https://doi.org/10.1080/00401706.1981.10487680>
- 517 Dittmar, J., Janssen, H., Kuske, A., Kurtz, J., & Scharsack, J. P. (2014). Heat and immunity: an  
518 experimental heat wave alters immune functions in three-spined sticklebacks (*Gasterosteus*  
519 *aculeatus*). *Journal of Animal Ecology*, **83**(4), 744–757. [https://doi.org/10.1111/1365-](https://doi.org/10.1111/1365-2656.12175)  
520 2656.12175
- 521 Ehrich, M. K., & Harris, L. A. (2015). A review of existing eastern oyster filtration rate models.  
522 *Ecological Modelling*, **297**, 201–212. <https://doi.org/10.1016/j.ecolmodel.2014.11.023>
- 523 Falfushynska, H., Gnatyshyna, L., Yurchak, I., Ivanina, A., Stoliar, O., & Sokolova, I. (2014).  
524 Habitat pollution and thermal regime modify molecular stress responses to elevated  
525 temperature in freshwater mussels (*Anodonta anatina*: Unionidae). *Science of The Total*  
526 *Environment*, **500–501**, 339–350. <https://doi.org/10.1016/j.scitotenv.2014.08.112>
- 527 Fulford, R. S., Breitburg, D. L., Newell, R. I. E., & Kemp, W. M. (2007). Effects of oyster  
528 population restoration strategies on phytoplankton biomass in Chesapeake Bay: a flexible  
529 modeling approach. *Marine Ecology Progress Series*, **336**, 43–61.
- 530 Goedknecht, M. A., Welsh, J. E., Drent, J., & Thielges, D. W. (2015). Climate change and parasite  
531 transmission: how temperature affects parasite infectivity via predation on infective stages.  
532 *Ecosphere*, **6**(6), 96. <https://doi.org/10.1890/ES15-00016.1>
- 533 Gopko, M., Mikheev, V. N., & Taskinen, J. (2015). Changes in host behaviour caused by immature  
534 larvae of the eye fluke: evidence supporting the predation suppression hypothesis. *Behavioral*  
535 *Ecology and Sociobiology*, **69**(10), 1723–1730. <https://doi.org/10.1007/s00265-015-1984-z>
- 536 Gopko, M., Mikheev, V. N., & Taskinen, J. (2017a). Deterioration of basic components of the anti-  
537 predator behavior in fish harboring eye fluke larvae. *Behavioral Ecology and Sociobiology*,  
538 **71**(4), 68. <https://doi.org/10.1007/s00265-017-2300-x>

- 539 Gopko, M., Mironova, E., Pasternak, A., Mikheev, V., & Taskinen, J. (2017b). Freshwater mussels  
540 (*Anodonta anatina*) reduce transmission of a common fish trematode (eye fluke, *Diplostomum*  
541 *pseudospathaceum*). *Parasitology*, **144**(14), 1971–1979.  
542 <https://doi.org/10.1017/S0031182017001421>
- 543 Harvell, C. D., Mitchell, C. E., Ward, J. R., Altizer, S., Dobson, A. P., Ostfeld, R. S., & Samuel, M.  
544 D. (2002). Climate Warming and Disease Risks for Terrestrial and Marine Biota. *Science*,  
545 **296**(5576), 2158–2162. <https://doi.org/10.1126/science.1063699>
- 546 Hayes, R. J. (1998). Methods for assessing whether change depends on initial value. *Statistics in*  
547 *Medicine*, **7**(9), 915–927. <https://doi.org/10.1002/sim.4780070903>
- 548 Hoverman, J. T., & Searle, C. L. (2016). Behavioural influences on disease risk: implications for  
549 conservation and management. *Animal Behaviour*, **120**, 263–271.  
550 <https://doi.org/10.1016/j.anbehav.2016.05.013>
- 551 IPCC, 2014: Climate Change 2014: Synthesis Report. Contribution of Working Groups I, II and III  
552 to the Fifth Assessment Report of the Intergovernmental Panel on Climate Change. [Core  
553 Writing Team, R.K. Pachauri and L.A. Meyer (eds.)]. IPCC, Geneva, Switzerland, 151 pp.
- 554 Johnson, P. T. J., Dobson, A., Lafferty, K. D., Marcogliese, D. J., Memmott, J., Orlofske, S. A., ...  
555 Thieltges, D. W. (2010). When parasites become prey: ecological and epidemiological  
556 significance of eating parasites. *Trends in Ecology & Evolution*, **25**(6), 362–371.  
557 <https://doi.org/https://doi.org/10.1016/j.tree.2010.01.005>
- 558 Karvonen, A., Savolainen, M., Seppälä, O., & Valtonen, E. T. (2006a). Dynamics of *Diplostomum*  
559 *spathaceum* infection in snail hosts at a fish farm. *Parasitology Research*, **99**(4), 341–345.  
560 <https://doi.org/10.1007/s00436-006-0137-8>
- 561 Karvonen, A., & Seppälä, O. (2008). Eye fluke infection and lens size reduction in fish: A  
562 quantitative analysis. *Diseases of Aquatic Organisms*, **80**(1), 21–26.

- 563 <https://doi.org/10.3354/dao01918>
- 564 Karvonen, A., Seppala, O., & Valtonen, E. T. (2004b). Parasite resistance and avoidance behaviour  
565 in preventing eye fluke infections in fish. *Parasitology*, *129*(2), 159–164. [https://doi.org/DOI:](https://doi.org/DOI:10.1017/S0031182004005505)  
566 [10.1017/S0031182004005505](https://doi.org/DOI:10.1017/S0031182004005505)
- 567 Kittner, C., & Riisgård, H. U. (2005). Effect of temperature on filtration rate in the mussel *Mytilus*  
568 *edulis*: no evidence for temperature compensation. *Marine Ecology Progress Series*, **305**, 147–  
569 152.
- 570 Klemme, I., & Karvonen, A. (2016). Learned parasite avoidance is driven by host personality and  
571 resistance to infection in a fish–trematode interaction. *Proceedings of the Royal Society B:*  
572 *Biological Sciences*, **283**(1838), 20161148. <https://doi.org/10.1098/rspb.2016.1148>
- 573 Koprivnikar, J., Gibson, C. H., & Redfern, J. C. (2012). Infectious personalities: behavioural  
574 syndromes and disease risk in larval amphibians. *Proceedings of the Royal Society B:*  
575 *Biological Sciences*, **279**(1733), 1544–1550. <https://doi.org/10.1098/rspb.2011.2156>
- 576 Krause, J., & Godin, J.-G. J. (1995). Predator preferences for attacking particular prey group sizes:  
577 consequences for predator hunting success and prey predation risk. *Animal Behaviour*, **50**(2),  
578 465–473. <https://doi.org/https://doi.org/10.1006/anbe.1995.0260>
- 579 Kuha, J., Arvola, L., Hanson, P., Huotari, J., Huttula, T., Juntunen, J., ... Karjalainen, J. (2016).  
580 Response of boreal lakes to episodic weather-induced events. *Inland Waters*, **6**(4), 523–534.
- 581 Kuris, A. M., Hechinger, R. F., Shaw, J. C., Whitney, K. L., Aguirre-Macedo, L., Boch, C. A., ...  
582 Lafferty, K. D. (2008). Ecosystem energetic implications of parasite and free-living biomass in  
583 three estuaries. *Nature*, **454**, 515–518. <http://dx.doi.org/10.1038/nature06970>
- 584 Kuznetsova, A., Brockhoff, P., & Christensen, R. (2017). lmerTest Package: Tests in Linear Mixed  
585 Effects Models. *Journal of Statistical Software*, **82**(13), 1–26.

- 586 <http://dx.doi.org/10.18637/jss.v082.i13>
- 587 Lafferty, K. D., Allesina, S., Arim, M., Briggs, C. J., De Leo, G., Dobson, A. P., ... Thieltges, D. W.  
588 (2008). Parasites in food webs: the ultimate missing links. *Ecology Letters*, **11**(6), 533–546.  
589 <https://doi.org/10.1111/j.1461-0248.2008.01174.x>
- 590 Löhmus, M., & Björklund, M. (2015). Climate change: what will it do to fish–parasite interactions?  
591 *Biological Journal of the Linnean Society*, **116**(2), 397–411. <https://doi.org/10.1111/bij.12584>
- 592 Ludecke, D. (2018). sjPlot: Data Visualization for Statistics in Social Science.  
593 <https://doi.org/10.5281/zenodo.1308157>
- 594 Lyholt, H., & Buchmann, K. (1996). *Diplostomum spathaceum*: effects of temperature and light on  
595 cercarial shedding and infection of rainbow trout. *Diseases of Aquatic Organisms*, **25**(3), 169–  
596 173.
- 597 Macnab, V., & Barber, I. (2011). Some (worms) like it hot: fish parasites grow faster in warmer  
598 water, and alter host thermal preferences. *Global Change Biology*, **18**(5), 1540–1548.  
599 <https://doi.org/10.1111/j.1365-2486.2011.02595.x>
- 600 Marcogliese, D. J. (2016). The Distribution and Abundance of Parasites in Aquatic Ecosystems in a  
601 Changing Climate: More than Just Temperature. *Integrative and Comparative Biology*, **56**(4),  
602 611–619. <http://dx.doi.org/10.1093/icb/icw036>
- 603 Mikheev, V. N., Pasternak, A. F., Taskinen, J., & Valtonen, E. T. (2010). Parasite-induced aggression  
604 and impaired contest ability in a fish host. *Parasites & Vectors*, **3**(1), 17.  
605 <https://doi.org/10.1186/1756-3305-3-17>
- 606 Mikheev, V. N., Pasternak, A. F., Valtonen, E. T., & Taskinen, J. (2014). Increased ventilation by  
607 fish leads to a higher risk of parasitism. *Parasites & Vectors*, **7**(1), 281.  
608 <https://doi.org/10.1186/1756-3305-7-281>

- 609 Milinski, M. (1977). Experiments on the selection by predators against spatial oddity of their prey.  
610 *Ethology*, **43**, 311–325.
- 611 Morley, N.J., Crane, M., & Lewis, J.W. (2001). Toxicity of cadmium and zinc to *Diplostomum*  
612 *spathaceum* (Trematoda: Diplostomidae) cercarial survival. *International Journal for*  
613 *Parasitology*, **31**(11), 1211–2117.
- 614 Mouritsen, K. N., Sørensen, M. M., Poulin, R., & Fredensborg, B. L. (2018). Coastal ecosystems on  
615 a tipping point: Global warming and parasitism combine to alter community structure and  
616 function. *Global Change Biology*, **24**(9), 4340–4356. <https://doi.org/10.1111/gcb.14312>
- 617 Owen, S. F., Barber, I., & Hart, P. J. B. (1993). Low level infection by eye fluke, *Diplostomum* spp.,  
618 affects the vision of three-spined sticklebacks, *Gasterosteus aculeatus*. *Journal of Fish Biology*,  
619 **42**(5), 803–806. <https://doi.org/10.1111/j.1095-8649.1993.tb00387.x>
- 620 Pechenik, J., & Fried, B. (1995). Effect of temperature on survival and infectivity of *Echinostoma*  
621 *trivolvis* cercariae: A test of the energy limitation hypothesis. *Parasitology*, **111**(3), 373–378.  
622 [doi:10.1017/S0031182000081920](https://doi.org/10.1017/S0031182000081920)
- 623 Poulin, R., Marcogliese, D. J., & McLaughlin, J. D. (2005). Skin-penetrating parasites and the  
624 release of alarm substances in juvenile rainbow trout. *Journal of Fish Biology*, **55**(1), 47–53.  
625 <https://doi.org/10.1111/j.1095-8649.1999.tb00655.x>
- 626 Pritchard, V. L., Lawrence, J., Butlin, R. K., & Krause, J. (2001). Shoal choice in zebrafish, *Danio*  
627 *rerio*: the influence of shoal size and activity. *Animal Behaviour*, **62**(6), 1085–1088.  
628 <https://doi.org/10.1006/anbe.2001.1858>
- 629 Quattrini, F. G., Bshary, R., & Roche, D. G. (2018). Does the presence of an odd individual affect  
630 group choice? *Behavioral Ecology*, **29**(4), 855–861. <http://dx.doi.org/10.1093/beheco/ary062>
- 631 Pusch, M., Siefert, J., & Walz, N. (2001). Filtration and Respiration Rates of Two Unionid Species

- 632 and Their Impact on the Water Quality of a Lowland River. In: Bauer G., & Wächtler K. (Eds.),  
633 Ecology and Evolution of the Freshwater Mussels Unionoida (pp. 317–326). Heidelberg:  
634 Springer, Berlin.
- 635 R Core team. (2018). R: A Language and Environment for Statistical Computing. Vienna, Austria.  
636 Retrieved from <https://www.r-project.org/>
- 637 Rellstab, C., Louhi, K.-R., Karvonen, A., & Jokela, J. (2011). Analysis of trematode parasite  
638 communities in fish eye lenses by pyrosequencing of naturally pooled DNA. *Infect Genet Evol*,  
639 **11**(6), 1276–1286. <https://doi.org/10.1016/j.meegid.2011.04.018>
- 640 Riisgård, H. U., & Seerup, D. F. (2003). Filtration rates in the soft clam *Mya arenaria*: effects of  
641 temperature and body size. *Sarsia*, **88**(6), 416–428.  
642 <https://doi.org/10.1080/00364820310003208>
- 643 Rodgers, G. M., Downing, B., & Morrell, L. J. (2015). Prey body size mediates the predation risk  
644 associated with being “odd.” *Behavioral Ecology*, **26**(1), 242–246.  
645 <http://dx.doi.org/10.1093/beheco/aru185>
- 646 Seppälä, O., Karvonen, A., & Tellervo Valtonen, E. (2004). Parasite-induced change in host  
647 behaviour and susceptibility to predation in an eye fluke–fish interaction. *Animal Behaviour*,  
648 **68**(2), 257–263. <https://doi.org/10.1016/j.anbehav.2003.10.021>
- 649 Sharma, S., Jackson, D. A., Minns, C. K., & Shuter, B. J. (2007). Will northern fish populations be  
650 in hot water because of climate change? *Global Change Biology*, **13**(10), 2052–2064.  
651 <https://doi.org/10.1111/j.1365-2486.2007.01426.x>
- 652 Poulin, R. (2006). Global warming and temperature-mediated increases in cercarial emergence in  
653 trematode parasites. *Parasitology*, **132**(1), 143–151. [https://doi.org/DOI:](https://doi.org/DOI:10.1017/S0031182005008693)  
654 [10.1017/S0031182005008693](https://doi.org/10.1017/S0031182005008693)

- 655 Scharsack, J., & Kalbe, M. (2014). Differences in susceptibility and immune responses of three-  
656 spined sticklebacks (*Gasterosteus aculeatus*) from lake and river ecotypes to sequential  
657 infections with the eye fluke *Diplostomum pseudospathaceum*. *Parasites & Vectors*, **7**(1), 109.  
658 <https://doi.org/10.1186/1756-3305-7-109>
- 659 Sharma, S., Gray, D. K., Read, J. S., O'Reilly, C. M., Schneider, P., Qudrat, A., ... Woo, K. H.  
660 (2015). A global database of lake surface temperatures collected by *in situ* and satellite  
661 methods from 1985–2009. *Scientific Data*, **2**, 150008. <https://doi.org/10.1038/sdata.2015.8>
- 662 Schmidt-Nielsen, K. (1997). *Animal physiology: adaptation and environment*. Cambridge  
663 University Press, Cambridge, UK.
- 664 Sovová, T., Boyle, D., Sloman, K. A., Vanegas Pérez, C., & Handy, R. D. (2014). Impaired  
665 behavioural response to alarm substance in rainbow trout exposed to copper nanoparticles.  
666 *Aquatic Toxicology*, **152**, 195–204. <https://doi.org/10.1016/j.aquatox.2014.04.003>
- 667 Studer, A., Thieltges, D. W., & Poulin, R. (2010). Parasites and global warming: net effects of  
668 temperature on an intertidal host–parasite system. *Marine Ecology Progress Series*, **415**, 11–22.  
669 Retrieved from <https://www.int-res.com/abstracts/meps/v415/p11-22/>
- 670 Stumbo, A., James, C., Goater, C., & Wisenden, B. (2012). Shoaling as an antiparasite defence in  
671 minnows (*Pimephales promelas*) exposed to trematode cercariae. *Journal of Animal Ecology*,  
672 **81**(6), 1319–1326. <https://doi.org/10.1111/j.1365-2656.2012.02012.x>
- 673 Thieltges, D. W., Jensen, K. T., & Poulin, R. (2008). The role of biotic factors in the transmission of  
674 free-living endohelminth stages. *Parasitology*, **135**(4), 407–426.  
675 <https://doi.org/10.1017/S0031182007000248>
- 676 Tu, Y.-K., Bælum, V., & Gilthorpe, M. S. (2005). The relationship between baseline value and its  
677 change: problems in categorization and the proposal of a new method. *European Journal of*  
678 *Oral Sciences*, **113**(4), 279–288. <https://doi.org/10.1111/j.1600-0722.2005.00229.x>

- 679 Tu, Y.-K., & Gilthorpe, M. S. (2007). Revisiting the relation between change and initial value: a  
680 review and evaluation. *Statistics in Medicine*, **26**(2), 443–457.  
681 <https://doi.org/10.1002/sim.2538>
- 682 Utaaker, K. S., & Robertson, L. J. (2015). Climate change and foodborne transmission of parasites:  
683 A consideration of possible interactions and impacts for selected parasites. *Food Research*  
684 *International*, **68**, 16–23. <https://doi.org/10.1016/j.foodres.2014.06.051>
- 685 Valtonen, E. T., & Gibson, D. I. (1997). Aspects of the biology of diplostomid metacercarial  
686 (Digenea) populations occurring in fishes in different localities of northern Finland. *Annales*  
687 *Zoologici Fennici*, **34**(1), 47–59.
- 688 Welsh, J. E., van der Meer, J., Brussaard, C. P. D., & Thieltges, D. W. (2014). Inventory of  
689 organisms interfering with transmission of a marine trematode. *Journal of the Marine*  
690 *Biological Association of the United Kingdom*, **94**(4), 697–702. [https://doi.org/DOI:](https://doi.org/DOI:10.1017/S0025315414000034)  
691 [10.1017/S0025315414000034](https://doi.org/DOI:10.1017/S0025315414000034)
- 692 Wickham, H. (2009). *ggplot2: Elegant Graphics for Data Analysis*. New York: Springer-Verlag.  
693 Retrieved from <http://ggplot2.org>
